# Supplementary material for: Selection of an Aptamer against the Enzyme 1-deoxy-D-xylulose-5-phosphate Reductoisomerase from Plasmodium falciparum
Source: MDPI journal article supplement (doi:10.3390/pharmaceutics14112515), 2022-11-19
Supplement: s1 [file s1]

# Supplementary Materials

Selection of an aptamer against the enzyme 1-deoxy-  
D-xylulose-5-phosphate reductoisomerase from  
*Plasmodium falciparum*

Carlota Roca, Yunuén Ávalos-Padilla, Beatriz Prieto-Simón,  
Valentín Iglesias, Miriam Ramírez, Santiago Imperial,  
Xavier Fernàndez-Busquets

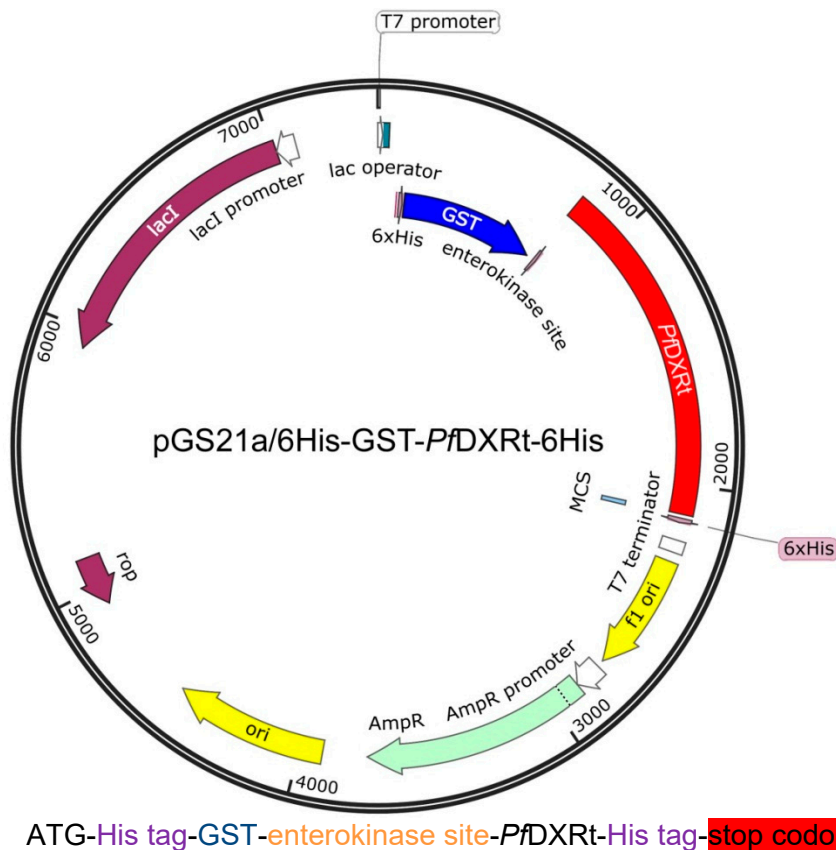

Recombinant protein sequence (670 amino acids, 76,774 kDa):

MSGSHHHHHSSGMSPILGYWKIKGLVQPTRLLLEYLEEKYEEHLYERDEGDKWRNKKFELGLEFPNLPYYIDGDVKLTQSMARIYIA  
DKHNMLGGCPKERAIEISMLEGAVLDIRYGVSRAYSKDFFETLKVDFLSKLPEMLKMFEDRLCHKTYLNGDHVTHPDFMLYDALDVVLY  
MDPMCLDAFPKLVCFKKRIEAIQIDKYLKSSKYIAWPLQGWQATFGGGDHPKSDLGHTGHRSGTDDDKAIAKKPINVAIFGSTGSIG  
TNALNIIRECNKIENFVNKALYVNKSVNELYEQAREFLPEYLCIHDKSVYEELKELVKNIDYKPIILCGDEGMKEICSSNSIDKIVIGIDSF  
QGLYSTMYAIMNNKIVALANKESIVSAGFFLKLLNIHKNKAIIPVDSEHSAIFQLDNNKVLKTKCLQDNFSKINNINKIFLCSSGGPFQFN  
LTMDLKNVTSENALKHPKWKMGGKITIDSATMMNKGLEVIETHFLFDVDYNDIEVIVHKECIIHSCVEFIDKSVISQMYYPDMQIPILYSLT  
WPDRIKTNLKLPLDLAQVSTLTFHKPSLEHFPCIKLAYQAGIKGNFYPTVLNASNEIANNLFLNNKIKYFDISSIISQVLESFNSQKVSENSE  
DLMKQILQIHSWAKDKATDIYNKHNSHHHHHH

GST-PfDXRt coding sequence (2,010 bases + stop codons):

ATGCTGTTCTCATCATCATCATCATAGCAGCGGTATGTCCCCTATACTAGGTTATTGGAAAATTAAGGGCCTTGTGCAACC  
CACTCGACTTCTTTTGAATATCTTGAAGAAAATATGAAGAGCATTGTATGAGCGCGATGAAGGTGATAAATGGCGAAACAAA  
AAGTTTGAATTGGGTTGGAGTTTCCCAATCTTCTTATTATATTGATGGTGATGTTAAATTAACACAGTCTATGGCCATCATACGT  
TATATAGCTGACAAGCACAAACATGTTGGGTGGTTGTCCAAAAGAGCGTGACAGAGATTTCATGCTTGAAGGAGCGGTTTTGGATA  
TTAGATACGGTGTTCGAGAATTGCATATAGTAAAGACTTTGAAACTCTCAAAGTTGATTTCTTAGCAAGCTACCTGAAATGCTG  
AAAATGTTTCAAGATCGTTTATGTCATAAAACATATTTAAATGGTGATCATGTAACCCATCCTGACTTCATGTTGATGACGCTCTT  
GATGTTGTTTTATACATGGACCCAATGTGCCTGGATGCGTTCCTCCAAAATTAGTTTGTTTAAAAAACGATTGAAGCTATCCACA  
AATTGATAAGTACTTGAAATCCAGCAAGTATATAGCATGGCCTTTTGAGGGCTGGCAAGCCACGTTTGGTGGTGGCGACCATCCT  
CCAAAATCGGATCTGGGCCACACAGGCCATAGATCTGGTACCATGACGACGACGACGACGATCAAGAAACCGATTAACGTGGC  
GATTTTTGGCAGCACCGGCAGCATTGGCACCAACGCGCTGAACATTATCCGTGAGTGCAACAAGATCGAAAACGTTTCAACGT  
TAAAGCGCTGTACGTGAACAAGAGCGTTAACGAGCTGTATGAACAGGCGCGTGAGTTTCTGCCGGAATACCTGTGCATCCACGA  
CAAAAGCGTGTATGAGGAAGTGAAGGAGCTGGTTAAGAACATTAAAGACTACAAGCCGATCATTCTGTGCGGTGATGAGGGCAT  
GAAAGAAATCTGCAGCAGCAACAGCATTGACAAGATCGTGATTGGTATCGATAGCTTCCAAGGCCTGTACAGCACCATGTATGC  
GATCATGAACAACAAAATTGTGGCGCTGGCGAACAAGGAGAGCATCGTTAGCGCGGGTTTCTTTCTGAAGAACTGCTGAACAT  
TCACAAAACGCGAAGATCATTCCGGTGGACAGCGAACAACAGCGCGATCTTCCAGTGCCTGGATAACAACAAAGTTCTGAAGAC  
CAAATGCCTGCAAGACAACCTCAGCAAGATCAACAACATCAACAAGATTTCTGTGAGCAGCGGTTGGCCGTTTTCAGAACCT  
GACCATGGATGAGCTGAAAACGTTACAGCGAACAACGCGCTGAAGCACCCGAAGTGGAAAATGGGTAAGAAAATTACCATCG  
ACAGCGCGACCATGATGAACAAGGGTCTGGAAGTATCGAAACCCACTTCTGTTGACGTTGATTACAACGATATCGAAGTGA  
TTGTTCAAAAGAATGCATCATTACAGCTGCGTGGAGTTTATCGACAAGAGCGTTATTAGCCAGATGTACTATCCGGATATGCA  
AATTCGATCTGTATAGCCTGACCTGGCCGGACCGTATCAAAACCAACCTGAAGCCGCTGGATCTGGCGCAGGTGAGCACCT  
GACCTTCCACAAGCCGAGCCTGGAACACTTTCCTGTGCATCAAACTGGCGTACCAAGCGGGTATTAAGGGCAACTTCTATCCGAC  
CGTTCTGAACGCGAGCAACGAGATCGCGAACAACCTGTTCTGAACAACAAGATCAAGTACTTCGACATCAGCAGCATCATCAG  
CCAGGTGCTGGAGAGCTTCAACAGCCAAAAGTTAGCGGAGAACAGCGAAGATCTGATGAAGCAGATCCTGCAAATTCACAGCT  
GGCGAAGGATAAAGCGACCGACATCTACAATAAGCACAAATAGCAGCACACCACCACCACCACCAATGA

**Figure S1.** *PfDXRt* cloned into the pGS21a expression vector. Plasmid map, recombinant protein scheme and amino acid sequence, and DNA sequence of *PfDXRt*.

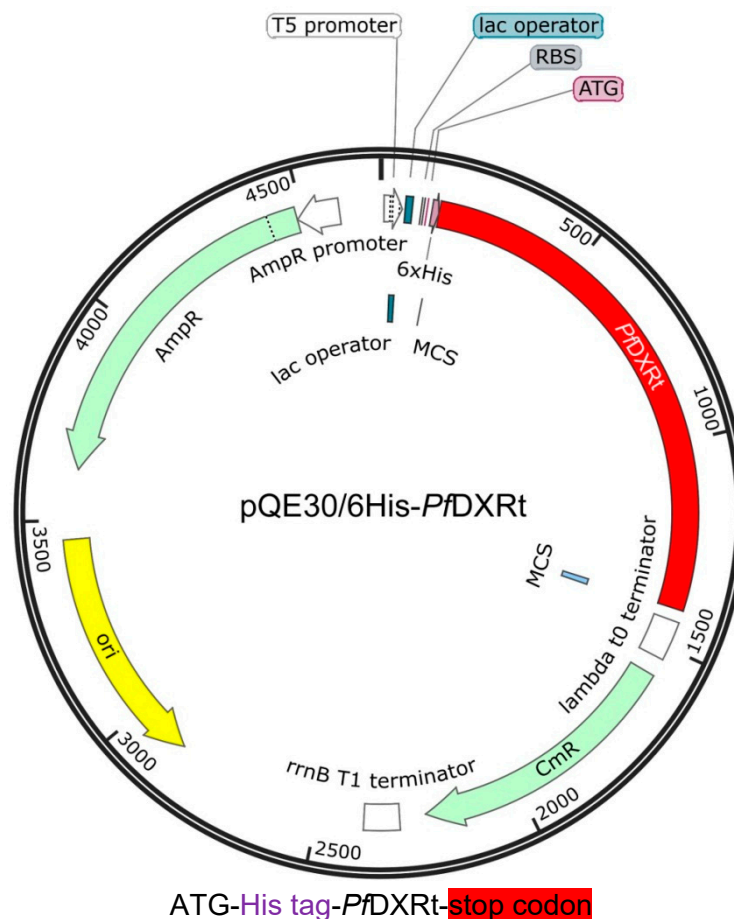

Recombinant protein sequence (428 amino acids, 48,658 kDa):

MRGSHHHHHHGSIAKKPINVAIFGSTGSIGTNALNIIECNKIENFVNVKALYVNVKSVNELYEQAREFLPEYLCHDKSVYEELKELVKNIK  
DYKPIILCGDEGMKEICSSNSIDKIVIGIDSFQGLYSTMYAIMNNKIVALANKESIVSAGFFLKLLNIHKNKAIIPVDSEHSAIFQCLDNNKV  
LKTCKLQDNFSKINNINKIFLCSSGGPFQNLTMDELKNVTSENALKHPKWKMGGKITIDSATMMNKGLEVIETHFLFDVDYNDIEVIVHKE  
CIIHSCVEFIDKSVISQMYYPDMQIPILYSLTWPDRIKTNLKLPLDLAQVSTLTFHKPSLEHFPCIKLAYQAGIKGNFYPTVLNASNEIANNLF  
LNNKIKYFDISSISQVLESFNSQKVSSENEDLMKQILQHSWAKDKATDIYNKHNS

*PfDXRt* coding sequence (1,284 bases + stop codon):

ATGAGAGGATCGATCACCATCACCATCACCATCAGGATCCGCGATTAAAAACCGATTAACTGCGGATTTTGGCAGCACCGGCAGC  
ATTGGCACCAACGCGCTGAACATTATTCGTGAATGCAACAAATTGAAAACGTGTTAACGTGAAAGCGCTGTATGTGAACAAAA  
GCGTGAACGAAGTGTATGAACAGGCGCGTGAATTTCTGCCGAATATCTGTGCATTCATGATAAAAGCGTGTATGAAGAAGTGA  
AAGAAGTGGTGAACAACTAAAGATTATAAACCATTATTCTGTGCGGCGATGAAGGCATGAAAGAAATTTGCAGCAGCAACA  
GCATTGATAAAATTGTGATTGGCATTGATAGCTTTTCAAGGCGCTGTATAGCACCATTGATGCGATTATGAACAACAAATTTGTGGC  
GCTGGCGAACAAAGAAAGCATTGTGAGCGCGGGCTTTTTCTGAAAAAACTGCTGAACATTCATAAAAAACGCGAAAAATTATCCG  
GTGGATAGCGAACATAGCGCGATTTTTCAGTGCCTGGATAACAACAAAGTGTGAAACCAAAATGCCTGCAGGATAACTTTAGC  
AAAATTAACAACATTAACAAATTTTTCTGTGCAGCAGCGCGCGCCCTTTTCAAGACCTGACCATGGATGAAGTGAACAACTGA  
CCAGCGAAAAACGCGCTGAAACATCCGAAATGGAAAAATGGGCAAAAAAATTACCATTGATAGCGCGACCATGATGAACAAAGGC  
CTGGAAGTGATTGAAACCCATTTTCTGTTGATGTGGATTATAACGATATTGAAGTGATTGTGCATAAAGAATGCATTATTCATAG  
CTGCGTGGAATTTATTGATAAAGCGTGATTAGCCAGATGTATTATCCGATATGCAGATTCCGATTCTGTATAGCCTGACCTGG  
CCGATCGTATTAACCAACCTGAAACCGCTGGATCTGGCGCAGGTGAGCACCTGACCTTTTCAAAACCGAGCCTGGAACAT  
TTTCCGTGCATTAACTGGCGTATCAGGCGGGCATTAAAGGCAACTTTTATCCGACCGTGCTGAACGCGAGCAACGAAATTGCG  
AACAACCTGTTTCTGAACAACAAATTAATATTTTGTATATTAGCAGCATTATTAGCCAGGTGCTGGAAAGCTTTAACAGCCAGAA  
AGTGAGCGAAAAACAGCGAAGATCTGATGAAACAGATTCTGCAGATTCATAGCTGGGCGAAAGATAAAGCGACCGATATTATAA  
CAAACATAACAGCAGCTGA

**Figure S2. *PfDXRt* cloned into the pQE30 expression vector.** Plasmid map, recombinant protein scheme and amino acid sequence, and DNA sequence of *PfDXRt*.

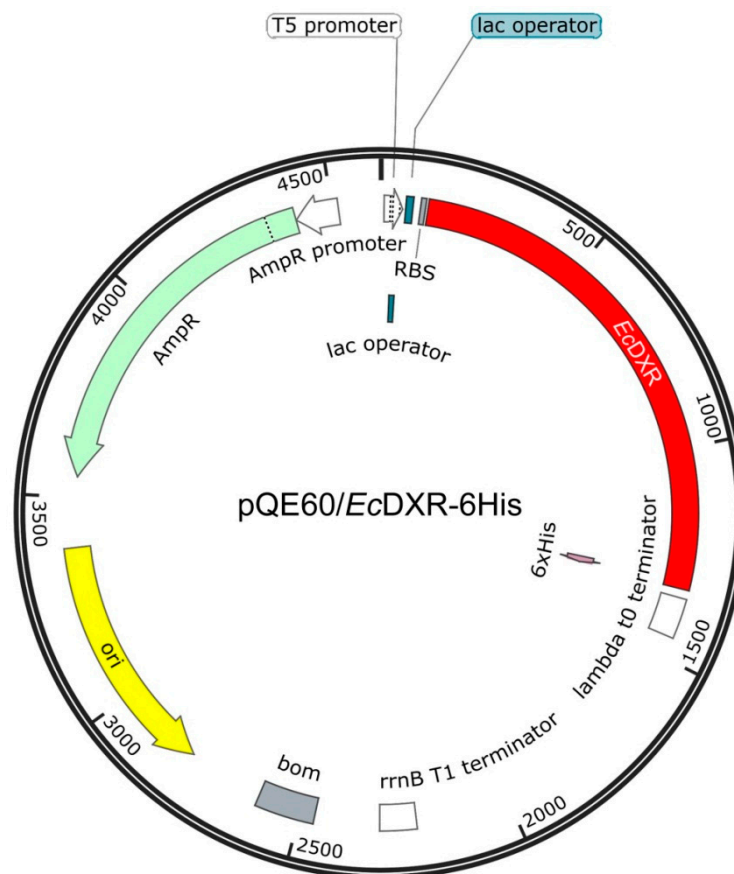

ATG-EcDXR- His tag-stop codon

Recombinant protein sequence (404 amino acids, 44,211 kDa):

MKQLTILGSTGSIGCSTLDVVRHNPEHFRVVALVAGKNVTRMVEQCLEFSPRYAVMDDEASAKLLKTM LQQQGSRT EVL SGQQAACD  
MAALEDVDQVMAAIVGAAGLLPTLAIRAGKTILLANKESLVTCGRLFMDAVKQSKAQLLPVDSEHNAIFQSLPQPIQHN LGYADLEQN  
GVVSILLTGSGGPFRETPLRDLATMTDPQACRHPNWSMGRKISVDSATMMNKGLEIEARWLFNASASQMEVLIHPQSVIHS MVRYQD  
GSVLAQLGEPDMRTPIAHTMAWPNRVNSGVKPLDFCKLSALTFAAPDYDRYPC LKLAMEAFEQQQAATTALNAANEITVAAFLAQQIR  
FTDIAALNLSVLEKMDMREPQCVDVLSVDANAREVARKEVMRLASHHHHHH

*EcDXR*t coding sequence (1,212 bases + stop codons):

ATGAAGCAACTGACCATTCTGGGCAGCACCCGGCAGCATCGGTTGCAGCACCCCTGGACGTGGTTCGCCATAATCCGGAGCATT  
CGCGTGGTTGCGCTGGTTGCGGGCAAGAACGTTACCCGTATGGTGGAGCAATGCCTGGAATTCAGCCCGCGTTACGCGGTTATG  
GACGATGAGGCGAGCGCGAAGCTGCTGAAAACCATGCTGCAGCAACAGGGTAGCCGTACCGAGGTGCTGAGCGGTCAACAGG  
CGCGTGCAGACATGGCGGCGCTGGAAGACGTGGATCAGGTTATGGCGGCGATCGTTGGTGCAGCGGGCCTGCTGCCGACCCT  
GGCGGCGATCCGTGCGGGCAAGACCATCTGCTGGCGCAACAAAGAGAGCCTGGTTACCTGCGGTCGTCTGTTTCATGGACGCGG  
TGAAGCAAAGCAAAGCGCAGCTGCTGCCGTTGATAGCGAACACAACGCGATCTTTCAAAGCCTGCCGCAACCGATTACGAC  
AACCTGGGTTATGCGGACCTGGAGCAGAACGGCGTGGTTAGCATTCTGCTGACCGGTAGCGGTGGCCCGTTCGCTGAAACCCC  
GCTGCGTGACCTGGCGACCATGACCCCGGATCAGGCGTGCCGTACCCGAACTGGAGCATGGGCGGTAAGATCAGCGTGGATA  
GCGCGACCATGATGAACAAAGGTCTGGAGTACATTGAAGCGCGTTGGCTGTTAACGCGAGCGCGAGCCAAATGGAAGTGCTG  
ATCCACCCGAGAGCGTTATTCACAGCATGGTGCCTTATCAAGACGGTAGCGTTCTGGCGCAGCTGGGCGAACCGGATATGCGT  
ACCCCGATTGCGCACACGATGGCGTGGCCGAACCGTGTTAACAGCGGCGTGAAGCCGCTGGACTTCTGCAAACCTGAGCGCGCT  
GACCTTTGCGGCGCCGGACTACGATCGTTATCCGTGCCTGAAGCTGGCGATGGAGGCGTTTGAACAAGGTCAAGCGGCGACCA  
CCGCGCTGAACGCGGCGAAGCAAATTACCGTGGCGGCGTTCTTGGCGCAACAGATCCGTTTACCGACATTGCGGCGCTGAAC  
CTGAGCGTTCTGGAGAAATGGATATGCGTGAACCGCAGTGCCTGGACGATGTTCTGAGCGTGGATGCGAACGCGCGTGAGGT  
TGCGCGTAAAGAGGTTATGCGTCTGGCGAGCCACCACCATCATCATTAATGA

**Figure S3.** *EcDXR* cloned into the pQE60 expression vector. Plasmid map, recombinant protein scheme and amino acid sequence, and DNA sequence of *EcDXR*.

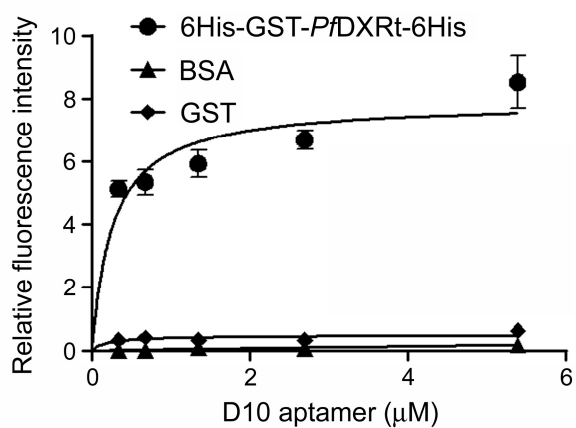

**Figure S4. Negative control binding of D10 to free GST.** Binding to BSA and to 6His-GST-PfDXRt-6His are included as references.

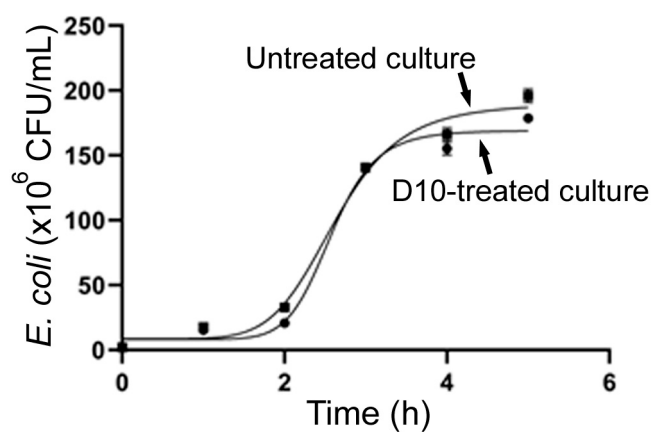

**Figure S5. Effect of 50  $\mu\text{M}$  D10 on the growth of an *E. coli* culture.**

**Table S1. Sequences of 96 subcloned individual oligonucleotides.** Sequence 44 corresponds to the D10 aptamer. The number of times that each individual sequence was obtained in the subcloning process is indicated. The PCR primer binding sequences are shown in red.

| Code | DNA sequence                                                                    | Repeats |
|------|---------------------------------------------------------------------------------|---------|
| 1    | ATACCAGCTTATTCAATT CAGCACATCCACCCACGTGTCCCTCCCGCCACTCGTCGCGAGATAGTAAGTGCAATCT   | 1       |
| 2    | ATACCAGCTTATTCAATT GGGCACACACACGGTAGTGTGCCCCCGCCACGTGGCATCAGATAGTAAGTGCAATCT    | 1       |
| 3    | ATACCAGCTTATTCAATT CGCCACACATACCCCTCTACCGCGTGGCACCATGCATGCAGATAGTAAGTGCAATCT    | 1       |
| 4    | ATACCAGCTTATTCAATT GACCCAGTCTGCACATGGGGAGTGTGTGCCGTGCTGCATCAGATAGTAAGTGCAATCT   | 1       |
| 5    | ATACCAGCTTATTCAATT CACTGCCACACCACTCCCTGCCATCCGCACATCCATGGTAAGATAGTAAGTGCAATCT   | 1       |
| 6    | ATACCAGCTTATTCAATT GACCCAATCAGTACGTGGGGAGCGTGTGCCGTGCTGCAGGAGATAGTAAGTGCAATCT   | 1       |
| 7    | ATACCAGCTTATTCAATT GGTGAGCAACATGCACCCACGTGTCCCTGCCCGTCATGCGAGATAGTAAGTGCAATCT   | 1       |
| 8    | ATACCAGCTTATTCAATT GCGATGAGTAGTGCACATGACCCGCCACCCTGCTGCATCGAGATAGTAAGTGCAATCT   | 1       |
| 9    | ATACCAGCTTATTCAATT CGCGGCACGGGGGGGCACACAACGCGGTCGATGCGGCATT CAGATAGTAAGTGCAATCT | 1       |
| 10   | ATACCAGCTTATTCAATT CCGCTCGCCGCAGCCGAACGACCGAGCGCAGCGAGTCAGGAGATAGTAAGTGCAATCT   | 1       |
| 11   | ATACCAGCTTATTCAATT ACCATGCATACACACCAGTCTGTGCGCGGTCATGTCATGTAGATAGTAAGTGCAATCT   | 1       |
| 12   | ATACCAGCTTATTCAATT CCGGTGCGATGTGCAGCTGTCTGT CAGTCCGTGCGTGTGAGATAGTAAGTGCAATCT   | 1       |
| 13   | ATACCAGCTTATTCAATT GCCAACACACCACTGGCCAGGGACACTCGTGATGCGCATCAGATAGTAAGTGCAATCT   | 1       |
| 14   | ATACCAGCTTATTCAATT CGACCACATGGCATCACCCACTGTTGTGCATT CATGGCACAGATAGTAAGTGCAATCT  | 1       |
| 15   | ATACCAGCTTATTCAATT CGACATGGCGGGCGGAATGCGCGCACGTACGTGTGTGGTGAGATAGTAAGTGCAATCT   | 1       |
| 16   | ATACCAGCTTATTCAATT CACTGCCACACAACGCCCTGCCATCCGCACATCCATCGTAGATAGTAAGTGCAATCT    | 1       |
| 17   | ATACCAGCTTATTCAATT GCCGTGTGGCGGGCGGGAGTGCACCAGGTGATGTTGTGTGAGATAGTAAGTGCAATCT   | 1       |
| 18   | ATACCAGCTTATTCAATT CAGAAGGGAGCGCCGACACAGGGCGTGGGTGGGCAAGGGAAGATAGTAAGTGCAATCT   | 1       |
| 19   | ATACCAGCTTATTCAATT TCCACATGACAGCCCTCACGGTGCGGGGTGCCCGTGGTGAAGATAGTAAGTGCAATCT   | 1       |
| 20   | ATACCAGCTTATTCAATT CAACGGAAGAACATGCCGAGGCCGCATCACACCATTCTGAGATAGTAAGTGCAATCT    | 1       |
| 21   | ATACCAGCTTATTCAATT GCACGATCGACATT CAGCGCATGTTCCCCGCACCTACACCAGATAGTAAGTGCAATCT  | 1       |
| 22   | ATACCAGCTTATTCAATT GTCCGATGCAACTGCGCCCACACTGTGTCTCCACGCATT CAGATAGTAAGTGCAATCT  | 1       |
| 23   | ATACCAGCTTATTCAATT CGCGACGGGACATACGCACCGTGATGGGTGTACATGTGGGAGATAGTAAGTGCAATCT   | 1       |
| 24   | ATACCAGCTTATTCAATT GACCCAATCAGTACGTGGGGAGCGTGGGCCGTGCTGCAGGAGATAGTAAGTGCAATCT   | 1       |
| 25   | ATACCAGCTTATTCAATT GGTGAGCAACATGCACCCACGTGTGGCTGCCCGTCATGCGAGATAGTAAGTGCAATCT   | 1       |
| 26   | ATACCAGCTTATTCAATT CGCATCAAACCGATGTACGCGTGCCCCCTGTTGTTGAGTCAGATAGTAAGTGCAATCT   | 1       |
| 27   | ATACCAGCTTATTCAATT CGCGGCACGGGGGGGCACACACCGCGGTCGATGCGGCATT CAGATAGTAAGTGCAATCT | 1       |
| 28   | ATACCAGCTTATTCAATT CCGCTCGCCGCAGCCGAACGACCGAGCGCAGCGAGTCAGGAGATAGTAAGTGCAATCT   | 1       |
| 29   | ATACCAGCTTATTCAATT ACCATGCATACACACCAGTCTCTGCGCGGTCATGTCATGCAGATAGTAAGTGCAATCT   | 1       |
| 30   | ATACCAGCTTATTCAATT CCGGTGCGCTGTGCAGCTGTCTGT CAGTCCGTGCGTGTGAGATAGTAAGTGCAATCT   | 1       |
| 31   | ATACCAGCTTATTCAATT CCGACCACATGCCATCACCCACTGTTGGGCATT CATGGCAAGATAGTAAGTGCAATCT  | 1       |
| 32   | ATACCAGCTTATTCAATT CGACATGGCGGGCGGCCCTGCGCGCACGTACGTGTGTGGTGAGATAGTAAGTGCAATCT  | 1       |
| 33   | ATACCAGCTTATTCAATT CACTGGGACACCACGCCCTGCCATCCGCCCATCCATCGTTAGATAGTAAGTGCAATCT   | 1       |
| 34   | ATACCAGCTTATTCAATT CGCGACGGGACATACGCAACGTGATGGGTGTACATGTGGTAGATAGTAAGTGCAATCT   | 2       |
| 35   | ATACCAGCTTATTCAATT CGTGGGCAGGGAACATCAGCAGTACCAGTGTGTGTGTGGTAGATAGTAAGTGCAATCT   | 3       |
| 36   | ATACCAGCTTATTCAATT CGAACCAACGTGATGATGCAACTGTGGCCATGTGGTGGGTAGATAGTAAGTGCAATCT   | 3       |
| 37   | ATACCAGCTTATTCAATT GACCCAATCAGTACGTGGGGAGCGTGTGCCGTGCTGCATCAGATAGTAAGTGCAATCT   | 4       |
| 38   | ATACCAGCTTATTCAATT CGAACCAACGTGATGATGCAACTGTGGCCATGTGGTGGGTAGATAGTAAGTGCAATCT   | 4       |
| 39   | ATACCAGCTTATTCAATT GATACGTACACACCGATCCGGCTGGTTGGCATGTGGCATGAGATAGTAAGTGCAATCT   | 5       |
| 40   | ATACCAGCTTATTCAATT CGACATGGCGGGCGGAATGCGCGTACGTACGTGTGTGGTGAGATAGTAAGTGCAATCT   | 6       |
| 41   | ATACCAGCTTATTCAATT CGACCATCCATGCCAGCTCGGCCAAGTTGTGGTGTGTGTGAGATAGTAAGTGCAATCT   | 6       |
| 42   | ATACCAGCTTATTCAATT CGCATCAAACCGATGTACGCGTGCCACATGTTGTTGAGTCAGATAGTAAGTGCAATCT   | 6       |
| 43   | ATACCAGCTTATTCAATT CACGACGGGACATACGCAACGTGATGGGTGTACATGTGGTAGATAGTAAGTGCAATCT   | 8       |
| D10  | ATACCAGCTTATTCAATT CACTGCCACACCACGCCCTGCCATCCGCACATCCATCGTAGATAGTAAGTGCAATCT    | 16      |
